# Supplementary material for: Highly specific and non-invasive imaging of Piezo1-dependent activity across scales using GenEPi
Source: Springer Nature journal article supplement (doi:10.1038/s41467-023-40134-y), 2023-07-19
Supplement: MOESM2 [file 41467_2023_40134_MOESM2_ESM.pdf]

File Name: Supplementary Movie 1

Description: TIRFM imaging of a GenEpi expressing HEK293T cell. Video of a representative HEK293T cell transiently expressing GenEpi. Time stamp in seconds, and scale bar 5  $\mu\text{m}$ .

File Name: Supplementary Movie 2

Description: Spontaneous beating of differentiated GenEpi cardiomyocytes. Video of a representative spontaneously beating differentiated cardiomyocyte patch. Time stamp in seconds, and scale bar 20  $\mu\text{m}$ .

File Name: Supplementary Movie 3

Description: GenEpi-expressing cells response to beating cardiomyocytes in a differentiated microtissue. Video of representative GenEpi expressing cells within a non-dissected spontaneously beating cardiomyocyte patch. Time stamp in seconds, and scale bar 5  $\mu\text{m}$ .

File Name: Supplementary Movie 4

Description: Live imaging of Tg(hsp70:GenEpi) zebrafish heart. Representative video of heart beating in a heatshocked Tg(hsp70:GenEpi) zebrafish. Scale bar 100  $\mu\text{m}$ .
